# Supplementary material
Source: Springer Nature journal article supplement (https://www.springermedizin.de/resource/supplementary/12961_2009_101_MOESM2_ESM.pdf/9571416)
Supplement: MOESM2 [file 9571416]

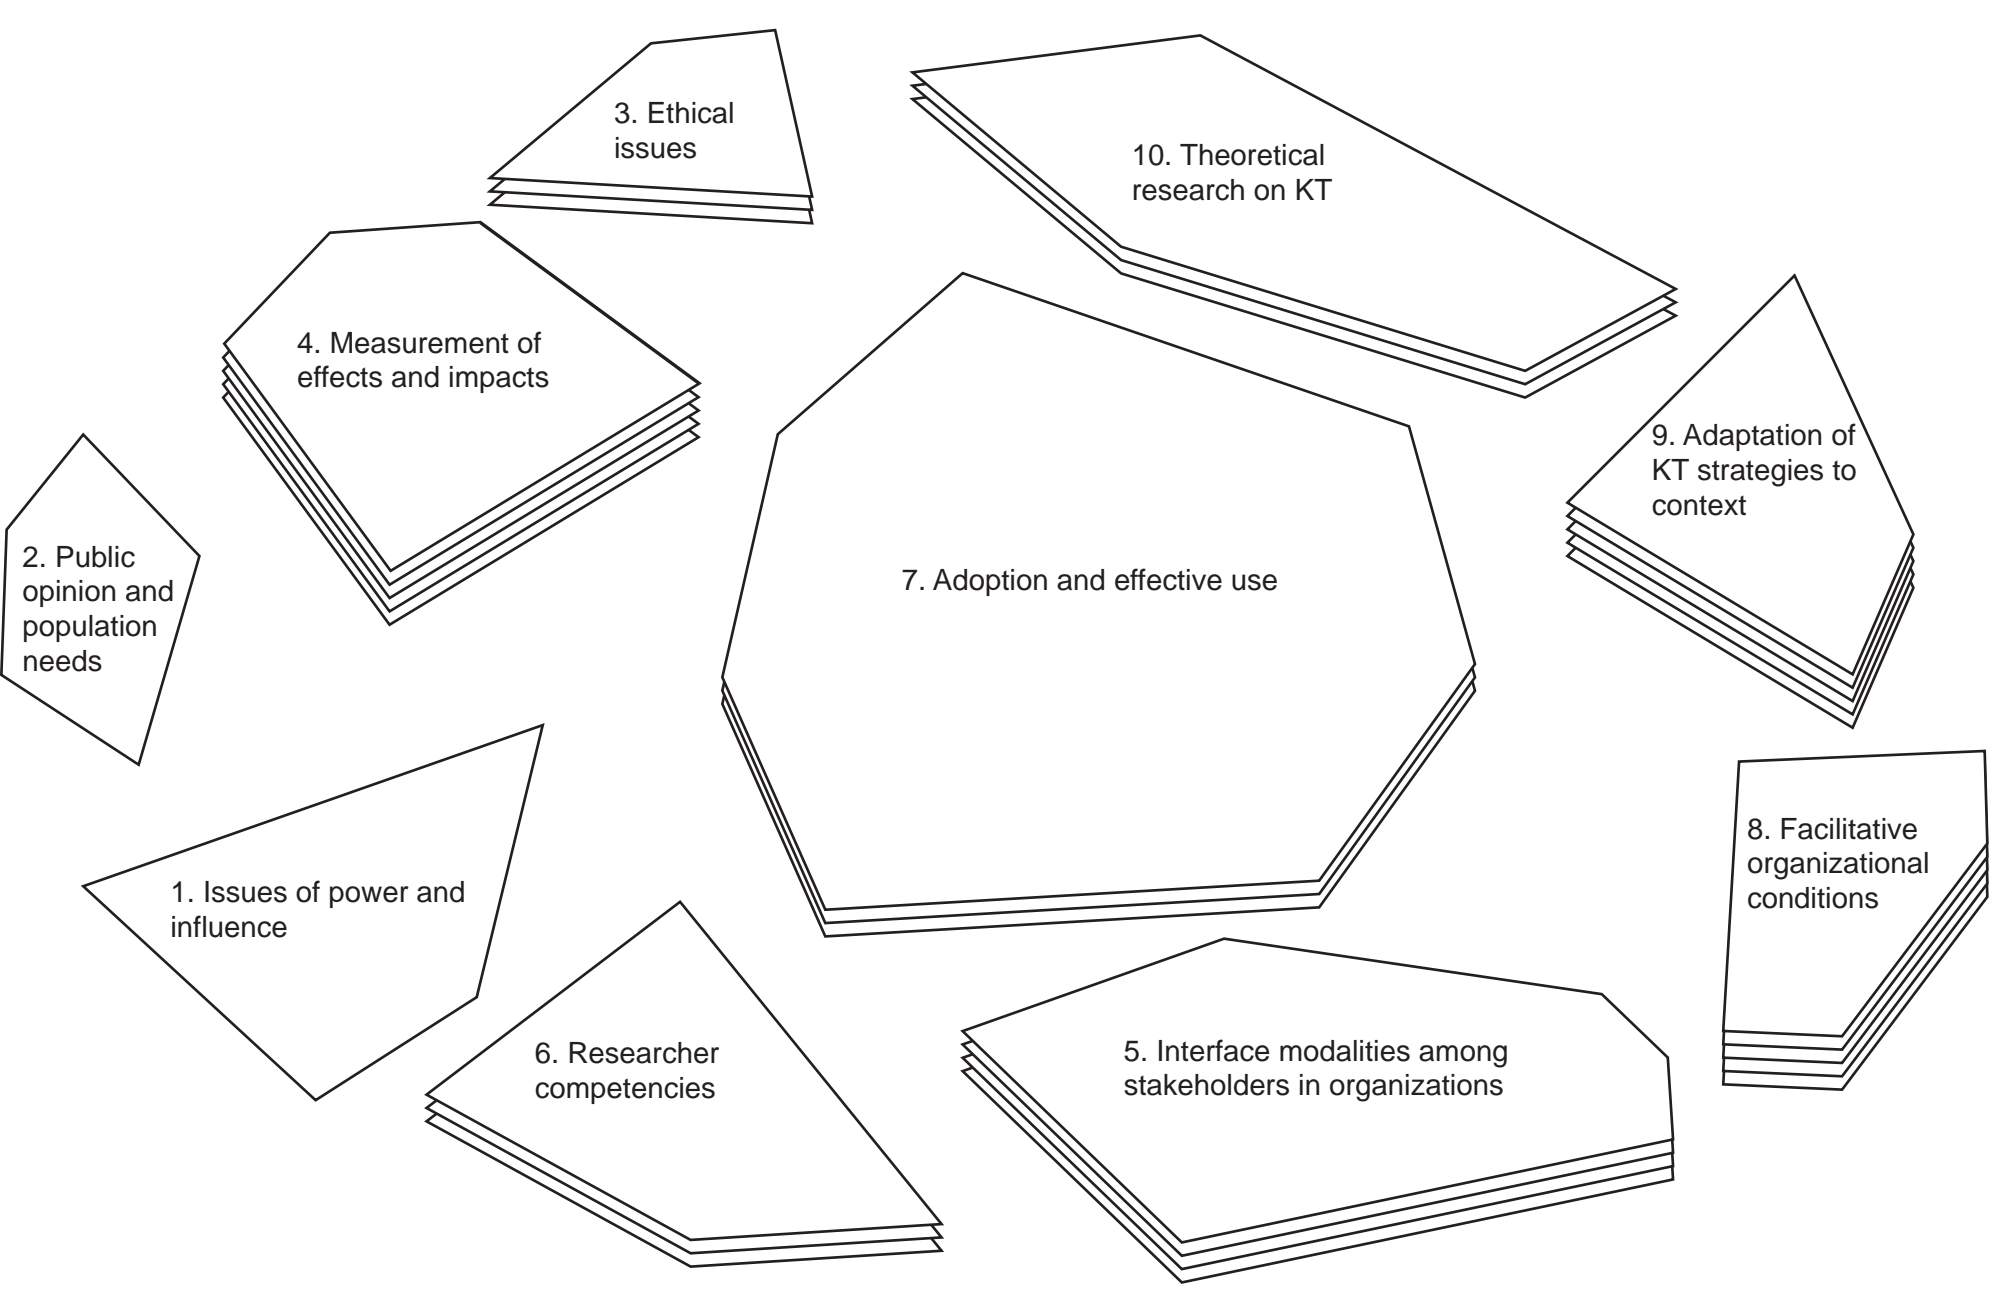

3. Ethical issues

10. Theoretical research on KT

4. Measurement of effects and impacts

9. Adaptation of KT strategies to context

7. Adoption and effective use

8. Facilitative organizational conditions

5. Interface modalities among stakeholders in organizations

6. Researcher competencies

1. Issues of power and influence

2. Public opinion and population needs
